# Supplementary material
Source: publisher figshare collection journal article supplement (https://tandf.figshare.com/ndownloader/files/14789498)
Supplement: Supplementary file 1 [file 14789498]

| | | | | **BBTN-2018-0071.R2 supplemental** | | --- | | | --- | --- | | | --- | --- | --- | | | --- | --- | --- | --- | |
| --- | --- | --- | --- | --- |


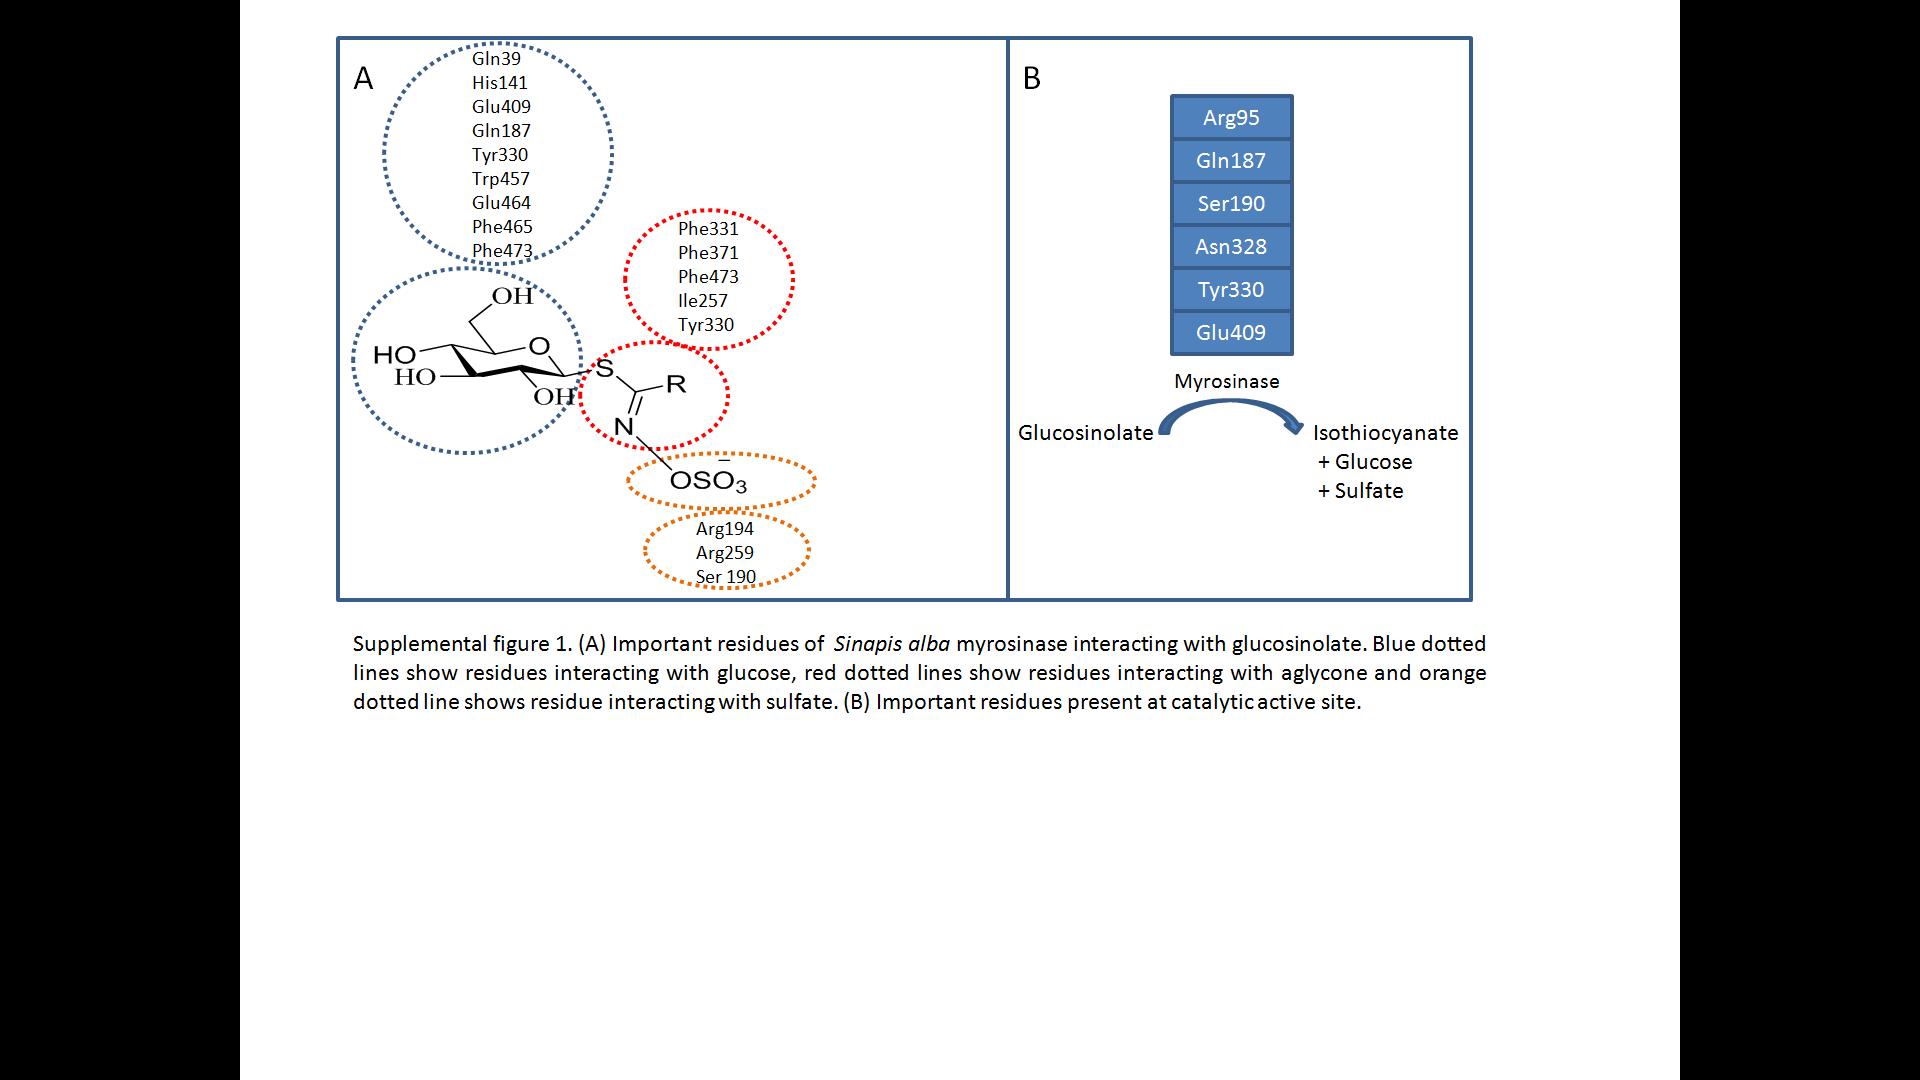


Supplemental figure 1: (A) Important residues of *Sinapis alba* myrosinase interacting with glucosinolate. Blue dotted lines show residues interacting with glucose, red dotted lines show residues interacting with aglycone and orange dotted line shows residue interacting with sulfate. (B) Important residues present at catalytic active site.

Supplemental table I: Myrosinase response to biotic stress. **↑**,increase and**↓**, decrease

| **Plant species** | **Insect** | **Nature** | **myrosinase activity** | **myrosinase transcript** | **Reference** |
| --- | --- | --- | --- | --- | --- |
| *Brassica rapa* | *Plutella xylostella* | Specialist insect | **↑**(3-fold) | - | [1] |
| *Brassica napus* | *Plutella xylostella* | Specialist insect | - | **↓** | [2] |
| *Brassica napus* | *Plutella xylostella* | Specialist insect | **↑** (1.5-fold) | - | [2] |
| *Brassica napus* | *Plutella xylostella* | Specialist insect | **↓** | - | [2] |
| *Sinapis alba* | *Athalia rosae* | Specialist insect | **↑**(3-fold) | - | [3] |
| *Sinapis alba* | *Spodoptera frugiperda* | Generalist insect | = | - | [3] |
| *Arabidopsis thaliana* | *Brevicoryne brassicae* | Specialist aphid | - | **↓***TGG1 AND TGG2* | [4] |
| *Arabidopsis thaliana* | *Myzus persicae* | Generalist aphid | - | **↓***TGG1 AND TGG2* | [4] |
| *Brassica juncea* | *A. rosae* | Specialist insect | **↓** | - | [5] |
| *Brassica napus* | *Leptosphaeria maculans* | Specialist fungous | = | - | [6] |

Supplemental table II: Myrosinase response to abiotic stress. **↑**,increase and**↓**, decrease

| **Plant species** | **Nature of stress** | **myrosinase activity** | **myrosinase transcript** | **Reference** |
| --- | --- | --- | --- | --- |
| *Sinapis alba* | Wounding | **↑** | - | [1] |
| *Thellungiella salsuginea* | Salt | **↑** | - | [7] |
| *Raphanus sativus* | Abscisic acid |  | **↑** | [8] |
| *Raphanus sativus* | Methyl jasmonate |  | **↑** | [8] |
| *Raphanus sativus* | Hydrogen peroxide |  | **↑** | [8] |
| *Raphanus sativus* | Wounding |  | **↓** | [8] |
| *Raphanus sativus* | Light | **↑** |  | [9] |
| *Brassica oleracea* | High salt | **↓** |  | [10] |
| *Brassica oleracea* | Elevated CO2 | **↓** |  | [10] |
| *Arabidopsis thaliana* | Low temperature | - | **↓***TGG1 AND TGG2* | [11] |
| *Brassica napus* | Drought | **↑** |  | [12] |
| *Arabidopsis thaliana* | Dark | **↑** |  | [13] |
| Diplotaxis tenuifolia | Heat |  | **↑** | [14] |

**References**

1. Siemens DH, Mitchell-Olds T. Evolution of pest-induced defenses in Brassica plants: tests of theory. Ecology, 1998;79:632-646.
2. Pontoppidan B, Hopkins R, Rask L, et al. Differential wound induction of the myrosinase system in oilseed rape (*Brassica napus*): contrasting insect damage with mechanical damage. Plant Sci. 2005;168:715-722.
3. Martin N, Muller C. Induction of plant responses by a sequestering insect: Relationship of glucosinolate concentration and myrosinase activity. Basic Appl Ecol. 2007;8:13-25.
4. Kusnierczyk A, Winge P, Midelfart H, et al. Transcriptional responses of *Arabidopsis thaliana* ecotypes with different glucosinolate profiles after attack by polyphagous *Myzus persicae* and oligophagous *Brevicoryne brassicae*. J Exp Bot. 2007;58:2537-2552.
5. Muller C, Sieling N. Effects of glucosinolate and myrosinase levels in *Brassica juncea* on a glucosinolate-sequestering herbivore–and vice versa. Chemoecology. 2006;16:191-201.
6. Andreasson E, Wretblad S, Granér G, et al. The myrosinase‐glucosinolate system in the interaction between *Leptosphaeria maculans* and *Brassica napus*. Mol Plant pathol. 2001;2:281-6.
7. Pang Q, Guo J, Chen S, et al. Effect of salt treatment on the glucosinolate-myrosinase system in *Thellungiella salsuginea*. Plant Soil. 2012;355:363-74.
8. Yan PA, Xu YY, Zhu XW, et al. Molecular characterization and expression profiles of myrosinase gene (RsMyr2) in radish (*Raphanus sativus* L.). J Integr Agric. 2014;13:1877-88.
9. Hasegawa T, Yamada K, Kosemura S, et al. Phototropic stimulation induces the conversion of glucosinolate to phototropism-regulating substances of radish hypocotyls. Phytochem. 2000;54:275-9.
10. Rodríguez-Hernández MD, Moreno DA, Carvajal M, et al. Genotype influences sulfur metabolism in broccoli (*Brassica oleracea* L.) under elevated CO2 and NaCl stress. Plant Cell Physiol. 2014;55:2047-59.
11. Kissen R, Eberl F, Winge P, et al. Effect of growth temperature on glucosinolate profiles in *Arabidopsis thaliana* accessions. Phytochem. 2016;130:106-18.
12. Koh J, Chen G, Yoo MJ, et al. Comparative proteomic analysis of *Brassica napus* in response to drought stress. J Proteome Res. 2015;14(8):3068-81.
13. Brandt S, Fachinger S, Tohge T, Fernie AR, Braun HP, Hildebrandt TM. Extended darkness induces internal turnover of glucosinolates in *Arabidopsis thaliana* leaves. PloS one. 2018 Aug 9;13(8):e0202153.
14. Cocetta G, Mishra S, Raffaelli A, et al. Effect of heat root stress and high salinity on glucosinolates metabolism in wild rocket. J Plant Physiol. 2018 Oct 6.
